# Supplementary material for: Estimation of Elastic Properties of Oil Palm Kernel Shell Concrete by Semianalytical Methods of Homogenisation
Source: Hindawi journal article supplement (doi:10.1155/2019/9256260), 2019-01-01
Supplement: f1 [file 9256260.f1.pdf]

---

**Data from the image analysis carried out on the face 1 of the RVE 60x60x60mm<sup>3</sup>**

| Particle | Area (A) | XM     | YM     | Major (L) | Minor (D) | Angle $\phi$<br>(deg) |
|----------|----------|--------|--------|-----------|-----------|-----------------------|
| 1        | 8.842    | 10.433 | 1.115  | 5.724     | 1.967     | 20.851                |
| 2        | 5.603    | 22.048 | 1.431  | 3.628     | 1.966     | 87.138                |
| 3        | 41.265   | 30.256 | 3.983  | 10.073    | 5.216     | 22.752                |
| 4        | 13.477   | 38.205 | 1.537  | 6.602     | 2.599     | 28.297                |
| 5        | 25.965   | 48.304 | 3.301  | 7.176     | 4.607     | 104.35                |
| 6        | 12.24    | 56.309 | 1.531  | 6.749     | 2.309     | 16.21                 |
| 7        | 6.547    | 13.107 | 3.979  | 3.946     | 2.112     | 149.53                |
| 8        | 6.66     | 18.052 | 5.029  | 4.776     | 1.775     | 70.207                |
| 9        | 5.445    | 55.307 | 4.355  | 5.173     | 1.34      | 163.369               |
| 10       | 25.425   | 40.756 | 7.088  | 7.767     | 4.168     | 179.479               |
| 11       | 9.562    | 3.235  | 7.991  | 5.974     | 2.038     | 152.092               |
| 12       | 13.387   | 55.139 | 8.438  | 7.226     | 2.359     | 26.239                |
| 13       | 9.832    | 12.307 | 7.791  | 7.289     | 1.718     | 169.316               |
| 14       | 9.427    | 26.782 | 8.391  | 7.786     | 1.542     | 172.393               |
| 15       | 10.89    | 20.099 | 9.975  | 5.225     | 2.654     | 45.009                |
| 16       | 11.452   | 25.624 | 12.837 | 5.731     | 2.544     | 50.355                |
| 17       | 4.388    | 1.376  | 11.83  | 3.427     | 1.63      | 40.827                |
| 18       | 15.57    | 29.979 | 13.51  | 6.862     | 2.889     | 48.578                |
| 19       | 11.655   | 10.05  | 12.706 | 5.458     | 2.719     | 10.868                |
| 20       | 22.095   | 12.851 | 15.354 | 10.447    | 2.693     | 57.908                |
| 21       | 6.503    | 37.75  | 13.426 | 3.757     | 2.204     | 19.036                |
| 22       | 12.42    | 21.435 | 15.316 | 5.993     | 2.639     | 92.109                |
| 23       | 7.897    | 58.732 | 14.909 | 3.447     | 2.917     | 62.281                |
| 24       | 26.212   | 15.933 | 18.274 | 8.273     | 4.034     | 92.46                 |
| 25       | 14.737   | 1.435  | 17.595 | 6.411     | 2.927     | 69.988                |
| 26       | 10.957   | 6.693  | 17.666 | 4.216     | 3.309     | 13.781                |
| 27       | 9.72     | 37.41  | 18.19  | 4.463     | 2.773     | 159.96                |
| 28       | 6.435    | 28.657 | 18.779 | 4.095     | 2.001     | 77.472                |
| 29       | 3.465    | 31.456 | 18.143 | 2.399     | 1.839     | 116.672               |
| 30       | 6.525    | 52.233 | 19.072 | 5.93      | 1.401     | 172.472               |
| 31       | 12.938   | 24.194 | 21.969 | 7.145     | 2.305     | 100.286               |
| 32       | 11.025   | 44.911 | 21.62  | 5.534     | 2.536     | 121.503               |
| 33       | 16.245   | 40.389 | 21.616 | 4.691     | 4.41      | 34.529                |
| 34       | 13.432   | 5.477  | 22.319 | 8.801     | 1.943     | 32.326                |
| 35       | 5.782    | 56.951 | 21.787 | 5.201     | 1.416     | 39.702                |
| 36       | 11.137   | 12.695 | 24.017 | 5.284     | 2.683     | 110.654               |
| 37       | 12.443   | 27.564 | 24.295 | 6.904     | 2.295     | 122.478               |
| 38       | 16.043   | 7.072  | 24.976 | 8.879     | 2.3       | 39.565                |
| 39       | 12.397   | 50.786 | 25.332 | 4.532     | 3.483     | 169.892               |
| 40       | 24.21    | 38.472 | 27.34  | 8.83      | 3.491     | 140.206               |
| 41       | 13.342   | 32.08  | 26.059 | 5.265     | 3.226     | 66.457                |
| 42       | 9.63     | 19.962 | 27.437 | 5.427     | 2.259     | 133.804               |
| 43       | 30.195   | 52.579 | 30.282 | 8.316     | 4.623     | 55.794                |
| 44       | 21.33    | 57.456 | 32.949 | 8.892     | 3.054     | 57.044                |
| 45       | 10.237   | 1.678  | 30.896 | 4.741     | 2.749     | 69.249                |
| 46       | 11.07    | 10.602 | 30.685 | 5.696     | 2.475     | 135.507               |
| 47       | 10.35    | 30.019 | 31.054 | 6.602     | 1.996     | 31.561                |
| 48       | 6.142    | 42.529 | 31.359 | 5.28      | 1.481     | 40.639                |
| 49       | 3.397    | 5.573  | 31.18  | 3.723     | 1.162     | 27.861                |
| 50       | 7.605    | 20.955 | 31.756 | 3.76      | 2.575     | 142.188               |
| 51       | 27.9     | 34.352 | 33.605 | 7.923     | 4.484     | 15.127                |
| 52       | 4.792    | 14.559 | 32.179 | 3.06      | 1.994     | 14.011                |

---

|           |        |        |        |        |       |         |
|-----------|--------|--------|--------|--------|-------|---------|
| <b>53</b> | 3.33   | 17.147 | 32.307 | 2.45   | 1.73  | 109.72  |
| <b>54</b> | 6.795  | 10.338 | 34.732 | 4.718  | 1.834 | 118.712 |
| <b>55</b> | 9.81   | 42.816 | 34.176 | 3.873  | 3.225 | 39.536  |
| <b>56</b> | 18.585 | 16.45  | 35.677 | 6.038  | 3.919 | 167.765 |
| <b>57</b> | 7.2    | 26.714 | 37.088 | 5.904  | 1.553 | 78.456  |
| <b>58</b> | 16.537 | 1.461  | 37.46  | 6.365  | 3.308 | 82.51   |
| <b>59</b> | 17.347 | 7.132  | 38.719 | 7.513  | 2.94  | 71.721  |
| <b>60</b> | 15.48  | 21.009 | 38.213 | 7.679  | 2.567 | 63.095  |
| <b>61</b> | 6.525  | 59.271 | 38.424 | 5.385  | 1.543 | 84.957  |
| <b>62</b> | 13.747 | 11.182 | 40.514 | 7.8    | 2.244 | 77.005  |
| <b>63</b> | 12.6   | 15.888 | 40.771 | 7.759  | 2.068 | 118.757 |
| <b>64</b> | 4.185  | 49.476 | 38.609 | 2.841  | 1.876 | 29.568  |
| <b>65</b> | 18.18  | 41.909 | 41.656 | 5.456  | 4.243 | 107.897 |
| <b>66</b> | 26.55  | 25.04  | 43.263 | 7.688  | 4.397 | 7.25    |
| <b>67</b> | 8.078  | 8.353  | 43.294 | 4.592  | 2.24  | 76.351  |
| <b>68</b> | 40.072 | 57.231 | 46.178 | 9.224  | 5.531 | 110.398 |
| <b>69</b> | 15.345 | 31.11  | 47.009 | 8.072  | 2.42  | 82.994  |
| <b>70</b> | 3.24   | 15.478 | 45.124 | 2.363  | 1.746 | 156.826 |
| <b>71</b> | 5.287  | 5.092  | 47.071 | 3.228  | 2.086 | 126.226 |
| <b>72</b> | 14.58  | 47.527 | 46.157 | 7.077  | 2.623 | 169.269 |
| <b>73</b> | 12.397 | 1.438  | 46.697 | 4.895  | 3.224 | 75.744  |
| <b>74</b> | 7.425  | 26.973 | 50.54  | 6.52   | 1.45  | 103.133 |
| <b>75</b> | 19.282 | 17.763 | 51.066 | 7.464  | 3.289 | 117.503 |
| <b>76</b> | 10.44  | 22.942 | 50.842 | 5.8    | 2.292 | 131.829 |
| <b>77</b> | 10.98  | 38.542 | 49.85  | 4.416  | 3.166 | 54.298  |
| <b>78</b> | 30.645 | 45.247 | 51.174 | 9.425  | 4.14  | 178.548 |
| <b>79</b> | 18.9   | 54.761 | 51.525 | 12.199 | 1.973 | 148.34  |
| <b>80</b> | 44.347 | 7.519  | 54.691 | 10.868 | 5.196 | 35.477  |
| <b>81</b> | 8.662  | 29.772 | 55.48  | 4.688  | 2.352 | 131.275 |
| <b>82</b> | 16.875 | 39.922 | 56.937 | 7.024  | 3.059 | 129.113 |
| <b>83</b> | 8.527  | 44.873 | 55.773 | 3.749  | 2.896 | 115.73  |
| <b>84</b> | 9.36   | 16.121 | 56.614 | 4.677  | 2.548 | 45.061  |
| <b>85</b> | 3.712  | 1.037  | 55.497 | 2.503  | 1.888 | 165.972 |
| <b>86</b> | 7.267  | 23.593 | 56.71  | 4.412  | 2.097 | 170.403 |
| <b>87</b> | 4.432  | 36.193 | 57.752 | 3.536  | 1.596 | 18.128  |

---

## Mathematical calculation codes for homogenisation models:

The input parameters in the calculation code are those from a study of Nguyen 2008 (see Figures 12 and 13 of section 3.3)

---

### Lower bound of Hashin Strikman

```
f=0.80
Em=2.518;
Ec=73.08;
Vm=0.413;
Vc=0.172;
r=3.018;
(*Valeur des coefficients km kc  $\bar{\nu}_m$  et  $\bar{\nu}_c$  *)
km=Em/3(1-2vm);
 $\bar{\nu}_m$ =Em/2(1+vm);
kc=Ec/3(1-2vc);
 $\bar{\nu}_c$ =Ec/2(1+vc);
 $\ell_m$ = (Em vm) / ((1+vm) (1-2vm));
 $\ell_c$ =(Ec vc) / ((1+vc) (1-2vc));
TenseurI=Table[1/2 (KroneckerDelta[i, k]
KroneckerDelta[j,l]+KroneckerDelta[i,l] KroneckerDelta[j,k]),
{i, 1,3},{j, 1,3},{k, 1,3},{l, 1,3}];
TenseurJ=1/3 TensorProduct[IdentityMatrix[3],
IdentityMatrix[3]];
TenseurK= TenseurI - TenseurJ;
TenseurCm= 3km TenseurJ + 2 $\bar{\nu}_m$  TenseurK;
TenseurCc= 3kc TenseurJ + 2 $\bar{\nu}_c$  TenseurK;
TenseurI//MatrixForm;
TenseurJ//MatrixForm;
TenseurK//MatrixForm;
Print["Tenseurs Cm et Cc"]
TenseurCm//MatrixForm
TenseurCc//MatrixForm
MatrixCm = ({
    { $\ell_m+2\bar{\nu}_m$ ,  $\ell_m$ ,  $\ell_m$ , 0, 0, 0},
    { $\ell_m$ ,  $\ell_m+2\bar{\nu}_m$ ,  $\ell_m$ , 0, 0, 0},
    { $\ell_m$ ,  $\ell_m$ ,  $\ell_m+2\bar{\nu}_m$ , 0, 0, 0},
```

---

```

        {0, 0, 0,  $\mp m$ , 0, 0},
        {0, 0, 0, 0,  $\mp m$ , 0},
        {0, 0, 0, 0, 0,  $\mp m$ }
    });
MatrixCc = ({
    { $l_c + 2\mp c$ ,  $l_c$ ,  $l_c$ , 0, 0, 0},
    { $l_c$ ,  $l_c + 2\mp c$ ,  $l_c$ , 0, 0, 0},
    { $l_c$ ,  $l_c$ ,  $l_c + 2\mp c$ , 0, 0, 0},
    {0, 0, 0,  $\mp c$ , 0, 0},
    {0, 0, 0, 0,  $\mp c$ , 0},
    {0, 0, 0, 0, 0,  $\mp c$ }
});
(*MatrixCm//MatrixForm
MatrixCc//MatrixForm*)
(*Calcul de l'inverse des tenseurs*)

TenseurSm = 1/(3km) TenseurJ + 1/(2 $\mp m$ ) TenseurK;
TenseurSc = 1/(3kc) TenseurJ + 1/(2 $\mp c$ ) TenseurK;
Print["Tenseurs de souplesse Sm et Sc"];
TenseurSm//MatrixForm
TenseurSc//MatrixForm

(*MatrixSm=Inverse[MatrixCm];
MatrixSc=Inverse[MatrixCc];
MatrixSm//MatrixForm
MatrixSc//MatrixForm*)

TenseurCmax= 3 Max[km, kc] TenseurJ + 2 Max[ $\mp m$ ,  $\mp c$ ] TenseurK;
TenseurCmin=3 Min[km, kc] TenseurJ + 2 Min[ $\mp m$ ,  $\mp c$ ] TenseurK;
TenseurSmax= 1/(3 Max[km, kc]) TenseurJ + 1/(2 Max[ $\mp m$ ,  $\mp c$ ])
TenseurK;
TenseurSmin= 1/(3 Min[km, kc]) TenseurJ + 1/(2 Min[ $\mp m$ ,  $\mp c$ ])
TenseurK;
Print["Tenseurs de rigidité et de souplesses des matériaux le
plus rigide et le plus souple Cmax ET Cmin"]
TenseurCmax//MatrixForm
TenseurCmin//MatrixForm

```

---

```

TenseurSmax//MatrixForm
TenseurSmin//MatrixForm
(*Entrée du tenseur de concentration d'Eshelby pour inclusion
ellipsoïdale de révolution*)

CoefG = r/(r^2-1)^(3/2) (r (r^2-1)^(1/2)- ArcCosh[r])
TenseurEsh=Table[0, {i, 1, 3}, {j, 1, 3}, {k, 1, 3}, {l, 1,
3}];
TenseurEsh[[1, 1, 1, 1]]=1/(2(1-vm))*(1 - 2vm +(3r^2-1)/(r^2-
1)-(1 - 2vm +(3r^2)/(r^2-1))*CoefG);
TenseurEsh[[2, 2, 2, 2]]=(3/(8(1-vm)))(r^2/(r^2-1))+1/(4(1-
vm)) (1 - 2vm - 9/(4(r^2-1))) CoefG;
TenseurEsh[[3, 3, 3, 3]] = TenseurEsh[[2, 2, 2, 2]];
TenseurEsh[[2, 2, 3, 3]] = 1/(4(1-vm)) (r^2/(2(r^2-1)) -(1 -
2vm + 3/(4(r^2-1))) CoefG);
TenseurEsh[[3, 3, 2, 2]]= TenseurEsh[[2, 2, 3, 3]];
TenseurEsh[[2, 2, 1, 1]]= -(1/(2(1-vm)))(r^2/(r^2-1))+1/(4(1-
vm)) ((3r^2)/(r^2-1)-(1 - 2vm )) CoefG;
TenseurEsh[[3, 3, 1, 1]]=TenseurEsh[[2, 2, 1, 1]];
TenseurEsh[[1, 1, 2, 2]]=-1/(2(1-vm))(1 - 2vm +1/(r^2-
1))+1/(2(1-vm)) (1 - 2vm +3/(r^2-1)) CoefG;
TenseurEsh[[1, 1, 3, 3]]=TenseurEsh[[1, 1, 2, 2]];
TenseurEsh[[2, 3, 2, 3]]=(1/(4(1-vm)))(r^2/(2(r^2-1)))+(1 -
2vm -3/(4(r^2-1))) CoefG);
TenseurEsh[[3, 2, 3, 2]]=TenseurEsh[[2, 3, 2, 3]];
TenseurEsh[[1, 2, 1, 2]]=(1/(4(1-vm)))(1 - 2vm - (r^2+1)/(r^2-
1)-1/2 (1 - 2vm -(3(r^2+1))/(r^2-1)) CoefG);
TenseurEsh[[1, 3, 1, 3]]=TenseurEsh[[3, 2, 3, 2]];
(*Symétrie mineure*)
TenseurEsh[[3, 2, 2, 3]]= TenseurEsh[[2, 3, 2, 3]];
TenseurEsh[[2, 3, 3, 2]]= TenseurEsh[[2, 3, 2, 3]];
TenseurEsh[[3, 2, 3, 2]]= TenseurEsh[[2, 3, 2, 3]];

TenseurEsh[[2, 1, 1, 2]]=TenseurEsh[[1, 2, 1, 2]];
TenseurEsh[[1, 2, 2, 1]]=TenseurEsh[[1, 2, 1, 2]];
TenseurEsh[[2, 1, 2, 1]]=TenseurEsh[[1, 2, 1, 2]];

TenseurEsh[[3, 1, 1, 3]]=TenseurEsh[[1, 3, 1, 3]];
TenseurEsh[[1, 3, 3, 1]]=TenseurEsh[[1, 3, 1, 3]];
TenseurEsh[[3, 1, 3, 1]]=TenseurEsh[[1, 3, 1, 3]];

Print[" Tenseur de concentration d'Eshelby"];
TenseurEsh//MatrixForm

```

```

TenseurP =TensorContract[TensorProduct[TenseurEsh,
TenseurSmin], {{3,5},{4,6}} ];

Print[" Tenseur de polarisation de Hill pour borne min"];
TenseurP//MatrixForm

(*Détermination de la décomposition du Tenseur P*)
VecteurE3={1,0,0};
TenseurEL=TensorProduct[VecteurE3,VecteurE3,VecteurE3,VecteurE
3];
MatrixiT=IdentityMatrix[3]-TensorProduct[VecteurE3,VecteurE3];
TenseurJT=1/2 TensorProduct[MatrixiT, MatrixiT];
TenseurIT=Table[0, {i,1,3}, {j, 1,3},{k, 1,3},{l, 1,3}];
TenseurIT[[3,3,3,3]]=1;
TenseurIT[[2,2,2,2]]=1;
TenseurIT[[3,2,3,2]]=1/2;
TenseurIT[[3,2,2,3]]=TenseurIT[[3,2,3,2]];
TenseurIT[[2,3,3,2]]=TenseurIT[[3,2,3,2]];
TenseurIT[[2,3,2,3]]=TenseurIT[[3,2,3,2]];
TenseurKE=1/6 TensorProduct[(2
TensorProduct[VecteurE3,VecteurE3]-MatrixiT), (2
TensorProduct[VecteurE3,VecteurE3]-MatrixiT)];
TenseurF= Sqrt[2]/2 TensorProduct[MatrixiT, VecteurE3,
VecteurE3];
TenseurKT= TenseurIT - TenseurJT;
TenseurKL =TenseurK-TenseurKT-TenseurKE;
TenseurFT=TensorTranspose[TenseurF, {3,4,1,2}];

Print["Affichage des tenseurs orthogonaux de décomposition de
P"];
(*TenseurEL//MatrixForm
MatrixiT//MatrixForm
TenseurJT//MatrixForm
TenseurIT//MatrixForm
TenseurKE//MatrixForm
TenseurKL//MatrixForm
TenseurKT//MatrixForm
TenseurF//MatrixForm
TenseurFT//MatrixForm*)
coef→=TensorContract[TensorProduct[TenseurEL,TenseurP],{{1,7},
{3,5},{4,6},{2,8}}];
coef↕=TensorContract[TensorProduct[TenseurJT,TenseurP],{{1,7},
{3,5},{4,6},{2,8}}];

```

---

```

coef•=TensorContract[TensorProduct[TenseurFT,TenseurP],{{1,7},{
3,5},{4,6},{2,8}}];
coef•p=TensorContract[TensorProduct[TenseurF,TenseurP],{{1,7},{
3,5},{4,6},{2,8}}];
coefO=(1/2)
TensorContract[TensorProduct[TenseurKT,TenseurP],{{1,7},{3,5},
{4,6},{2,8}}];
coefOp=(1/2)
TensorContract[TensorProduct[TenseurKL,TenseurP],{{1,7},{3,5},
{4,6},{2,8}}];
coef→c=coef↕/(coef→ coef↕-coef•^2);
coef↕c=coef→/(coef→ coef↕-coef•^2);
coef•c=- coef•/(coef→ coef↕-coef•^2);
coef•pc=- coef•/(coef→ coef↕-coef•^2);
coefOc=1/coefO;
coefOpc=1/coefOp;

Print["Affichage du tenseur P de Hill et de son inverse après
reconstitution"]
TenseurP = coef→ TenseurEL + coef↕ TenseurJT + coef• TenseurF
+ coef•p TenseurFT + coefO TenseurKT + coefOp TenseurKL;
TenseurPinv = coef→c TenseurEL + coef↕c TenseurJT + coef•c
TenseurF + coef•pc TenseurFT + coefOc TenseurKT + coefOpc
TenseurKL;
TenseurP//MatrixForm
TenseurPinv//MatrixForm

(*Calcul du tenseur d'influence de Hill*)
Print["Affichage du Tenseur CminStar"]
TenseurCminStar=TenseurPinv-TenseurCmin;
TenseurCminStar//MatrixForm

Print["Les sommes du tenseur de Hill avec chacun des tenseurs
Cm et Cc "]
TenseurCminStarCm=TenseurCminStar+TenseurCm;
TenseurCminStarCc=TenseurCminStar+TenseurCc;
TenseurCminStarCm//MatrixForm;

```

```

TenseurCminStarCc//MatrixForm;

Print["Affichage du tenseur (TenseurCminStar + Cc) et de son
inverse "]
coef $\rightarrow$ 3=TensorContract[TensorProduct[TenseurEL,TenseurCminStarC
c],{{1,7},{3,5},{4,6},{2,8}}];
coef $\updownarrow$ 3=TensorContract[TensorProduct[TenseurJT,TenseurCminStarC
c],{{1,7},{3,5},{4,6},{2,8}}];
coef $\bullet$ 3=TensorContract[TensorProduct[TenseurFT,TenseurCminStarCc
],{{1,7},{3,5},{4,6},{2,8}}];
coef $\bullet$ p3=TensorContract[TensorProduct[TenseurF,TenseurCminStarCc
],{{1,7},{3,5},{4,6},{2,8}}];
coefO3=1/2
TensorContract[TensorProduct[TenseurKT,TenseurCminStarCc],{{1,
7},{3,5},{4,6},{2,8}}];
coefOp3=1/2
TensorContract[TensorProduct[TenseurKL,TenseurCminStarCc],{{1,
7},{3,5},{4,6},{2,8}}];
coef $\rightarrow$ c3=coef $\updownarrow$ 3/(coef $\rightarrow$ 3 coef $\updownarrow$ 3-coef $\bullet$ 3^2);
coef $\updownarrow$ c3=coef $\rightarrow$ 3/(coef $\rightarrow$ 3 coef $\updownarrow$ 3-coef $\bullet$ 3^2);
coef $\bullet$ c3=- coef $\bullet$ 3/(coef $\rightarrow$ 3 coef $\updownarrow$ 3-coef $\bullet$ 3^2);
coef $\bullet$ pc3=- coef $\bullet$ 3/(coef $\rightarrow$ 3 coef $\updownarrow$ 3-coef $\bullet$ 3^2);
coefOc3=1/coefO3;
coefOpc3=1/coefOp3;
TenseurCminStarCc = coef $\rightarrow$ 3 TenseurEL + coef $\updownarrow$ 3 TenseurJT +
coef $\bullet$ 3 TenseurF + coef $\bullet$ p3 TenseurFT + coefO3 TenseurKT +
coefOp3 TenseurKL;
TenseurCminStarCcinv = coef $\rightarrow$ c3 TenseurEL + coef $\updownarrow$ c3 TenseurJT +
coef $\bullet$ c3 TenseurF + coef $\bullet$ pc3 TenseurFT + coefOc3 TenseurKT +
coefOpc3 TenseurKL;

TenseurCminStarCc//MatrixForm;
TenseurCminStarCcinv//MatrixForm;

```



---

```

Print["Affichage du tenseur (TenseurCminStar + Cm) et de son
inverse "]
coef $\rightarrow$ 4=TensorContract[TensorProduct[TenseurEL,TenseurCminStarC
m],{{1,7},{3,5},{4,6},{2,8}}];
coef $\updownarrow$ 4=TensorContract[TensorProduct[TenseurJT,TenseurCminStarC
m],{{1,7},{3,5},{4,6},{2,8}}];
coef $\bullet$ 4=TensorContract[TensorProduct[TenseurFT,TenseurCminStarCm
],{{1,7},{3,5},{4,6},{2,8}}];
coef $\bullet$ p4=TensorContract[TensorProduct[TenseurF,TenseurCminStarCm
],{{1,7},{3,5},{4,6},{2,8}}];
coefO4=1/2
TensorContract[TensorProduct[TenseurKT,TenseurCminStarCm],{{1,
7},{3,5},{4,6},{2,8}}];
coefOp4=1/2
TensorContract[TensorProduct[TenseurKL,TenseurCminStarCm],{{1,
7},{3,5},{4,6},{2,8}}];
coef $\rightarrow$ c4=coef $\updownarrow$ 4/(coef $\rightarrow$ 4 coef $\updownarrow$ 4-coef $\bullet$ 4^2);
coef $\updownarrow$ c4=coef $\rightarrow$ 4/(coef $\rightarrow$ 4 coef $\updownarrow$ 4-coef $\bullet$ 4^2);
coef $\bullet$ c4=- coef $\bullet$ 4/(coef $\rightarrow$ 4 coef $\updownarrow$ 4-coef $\bullet$ 4^2);
coef $\bullet$ pc4=- coef $\bullet$ 4/(coef $\rightarrow$ 4 coef $\updownarrow$ 4-coef $\bullet$ 4^2);
coefOc4=1/coefO4;
coefOpc4=1/coefOp4;
TenseurCminStarCm = coef $\rightarrow$ 4 TenseurEL + coef $\updownarrow$ 4 TenseurJT +
coef $\bullet$ 4 TenseurF + coef $\bullet$ p4 TenseurFT + coefO4 TenseurKT +
coefOp4 TenseurKL;
TenseurCminStarCminv = coef $\rightarrow$ c4 TenseurEL + coef $\updownarrow$ c4 TenseurJT +
coef $\bullet$ c4 TenseurF + coef $\bullet$ pc4 TenseurFT + coefOc4 TenseurKT +
coefOpc4 TenseurKL;

TenseurCminStarCm//MatrixForm;
TenseurCminStarCminv//MatrixForm;

Print["Affichage des TenseurAAA=Tenseur [Vm(Cmin*+Cm)^-
1+Vc(Cmin*+Cc)^-1] et de son inverse"]
TenseurAAA=(1-f)*TenseurCminStarCminv+f*TenseurCminStarCcinv;

```

---

```

coefH→6=TensorContract[TensorProduct[TenseurEL,TenseurAAA],{{1,
7},{3,5},{4,6},{2,8}}];
coef↑6=TensorContract[TensorProduct[TenseurJT,TenseurAAA],{{1,
7},{3,5},{4,6},{2,8}}];
coef•6=TensorContract[TensorProduct[TenseurFT,TenseurAAA],{{1,7
},{3,5},{4,6},{2,8}}];
coef•p6=TensorContract[TensorProduct[TenseurF,TenseurAAA],{{1,7
},{3,5},{4,6},{2,8}}];
coefO6=1/2
TensorContract[TensorProduct[TenseurKT,TenseurAAA],{{1,7},{3,5
},{4,6},{2,8}}];
coefOp6=1/2
TensorContract[TensorProduct[TenseurKL,TenseurAAA],{{1,7},{3,5
},{4,6},{2,8}}];
coefH→c6=coef↑6/(coefH→6 coef↑6-coef•6^2);
coef↑c6=coefH→6/(coefH→6 coef↑6-coef•6^2);
coef•c6=- coef•6/(coefH→6 coef↑6-coef•6^2);
coef•pc6=- coef•6/(coefH→6 coef↑6-coef•6^2);
coefOc6=1/coefO6;
coefOpc6=1/coefOp6;

TenseurAAA = coefH→6 TenseurEL + coef↑6 TenseurJT + coef•6
TenseurF + coef•p6 TenseurFT + coefO6 TenseurKT + coefOp6
TenseurKL;
TenseurAAAinv= coefH→c6 TenseurEL + coef↑c6 TenseurJT + coef•c6
TenseurF + coef•pc6 TenseurFT + coefOc6 TenseurKT + coefOpc6
TenseurKL;
TenseurAAA//MatrixForm;
TenseurAAAinv//MatrixForm;
Print["Borne inférieure de Hashin-Strikman unidirectionnelle"]

TenseurHashinInf=TensorContract[TensorProduct[((1-
f)TensorContract[TensorProduct[TenseurCm,TenseurCminStarCminv]
,{{3,5},{4,6}}]+ f
TensorContract[TensorProduct[TenseurCc,TenseurCminStarCcinv],{
{3,5},{4,6}}]),TenseurAAAinv],{{3,5},{4,6}}];

```

---

```

TenseurHashinInf//MatrixForm

Print["Tenseur d'orientation a2 et détermination de a4"]
a2={{1/3,0,0},{0,1/3,0},{0,0,1/3}};
Id={{1,0,0},{0,1,0},{0,0,1}};
a4=Table[(-
1/35)*(Id[[i,j]]*Id[[k,l]]+Id[[i,k]]*Id[[j,l]]+Id[[i,l]]*Id[[j
,k]])+(1/7)*(a2[[i,j]]*Id[[k,l]]+a2[[i,k]]*Id[[j,l]]+a2[[i,l]]
*Id[[j,k]]+a2[[k,l]]*Id[[i,j]]+a2[[j,l]]*Id[[i,k]]+a2[[j,k]]*I
d[[i,l]]),{i, 1,3},{j,1,3},{k,1,3},{l,1,3}];
a4=TensorProduct[a2, a2];
a2//MatrixForm
a4//MatrixForm

Print["Calcul des constantes B de la borne inférieure"]

Hsi=TenseurHashinInf;
B1i=Hsi[[1, 1, 1, 1]]+Hsi[[2, 2, 2, 2]]-2*Hsi[[1, 1, 2, 2]]-
4*Hsi[[1, 2, 1, 2]];
B2i=Hsi[[1, 1, 2, 2]]-Hsi[[2, 2, 3, 3]];
B3i=Hsi[[1, 2, 1, 2]]+0.5*(Hsi[[2, 2, 3, 3]]-Hsi[[2, 2, 2,
2]]);
B4i=Hsi[[2, 2, 3, 3]];
B5i=1/2*(Hsi[[2, 2, 2, 2]]-Hsi[[2, 2, 3, 3]])

Print["Tenseur de rigidité effective du composite : borne
inférieure"]
Ti=Table[B1i*a4[[i, j, k,
l]]+B2i(a2[[i,j]]*Id[[k,l]]+a2[[k,l]]*Id[[i,j]])+B3i*(a2[[i,k]
]*Id[[j,l]]+a2[[i,l]]*Id[[j,k]]+a2[[j,l]]*Id[[i,k]]+a2[[j,k]]*
Id[[i,l]])+B4i*Id[[i,j]]*Id[[k,l]]+B5i*(Id[[i,k]]*Id[[j,l]]+Id
[[i,l]]*Id[[j,k]]),{i,1,3},{j,1,3},{k,1,3},{l,1,3}];
Ti//MatrixForm

Print["Les constantes de LAME lambda et mu sont données par :
"]
Lbdi=Ti[[1, 1, 2, 2]]
Mui=Ti[[1, 2, 1, 2]]
Print["Les caracteristiques mecaniques : E et upsilon sont :
"]
Myi=Mui*(3*Lbdi+2*Mui)/(Lbdi+Mui)
pi=((1/2) Lbdi)/(Lbdi+Mui)

```

## Upper Bound of Hashin Strikman

---

```

f=0.80
Em=2.518;
Ec=73.08;
vm=0.413;
vc=0.172;
r=3.018;

(*Valeur des coefficients km kc  $\bar{\nu}_m$  et  $\bar{\nu}_c$  *)
km=Em/(3(1-2vm));
 $\bar{\nu}_m$ =Em/(2(1+vm));
kc=Ec/(3(1-2vc));
 $\bar{\nu}_c$ =Ec/(2(1+vc));

 $\ell_m$ =(Em vm)/((1+vm) (1-2vm));
 $\ell_c$ =(Ec vc)/((1+vc) (1-2vc));

TenseurI=Table[1/2 (KroneckerDelta[i, k]
KroneckerDelta[j,l]+KroneckerDelta[i,l] KroneckerDelta[j,k]),
{i, 1,3},{j, 1,3},{k, 1,3},{l, 1,3}];
TenseurJ=1/3 TensorProduct[IdentityMatrix[3],
IdentityMatrix[3]];
TenseurK= TenseurI - TenseurJ;
TenseurCm= 3km TenseurJ + 2 $\bar{\nu}_m$  TenseurK;
TenseurCc= 3kc TenseurJ + 2 $\bar{\nu}_c$  TenseurK;

TenseurI//MatrixForm;
TenseurJ//MatrixForm;
TenseurK//MatrixForm;
Print["Tenseurs Cm et Cc"]
TenseurCm//MatrixForm
TenseurCc//MatrixForm
MatrixCm = ({
    { $\ell_m+2\bar{\nu}_m$ ,  $\ell_m$ ,  $\ell_m$ , 0, 0, 0},
    { $\ell_m$ ,  $\ell_m+2\bar{\nu}_m$ ,  $\ell_m$ , 0, 0, 0},
    { $\ell_m$ ,  $\ell_m$ ,  $\ell_m+2\bar{\nu}_m$ , 0, 0, 0},
    {0, 0, 0,  $\bar{\nu}_m$ , 0, 0},
    {0, 0, 0, 0,  $\bar{\nu}_m$ , 0},
    {0, 0, 0, 0, 0,  $\bar{\nu}_m$ }
});
MatrixCc = ({
    { $\ell_c+2\bar{\nu}_c$ ,  $\ell_c$ ,  $\ell_c$ , 0, 0, 0},

```

---

```

        {lc, lc+2 $\mp$ c, lc, 0, 0, 0},
        {lc, lc, lc+2 $\mp$ c, 0, 0, 0},
        {0, 0, 0,  $\mp$ c, 0, 0},
        {0, 0, 0, 0,  $\mp$ c, 0},
        {0, 0, 0, 0, 0,  $\mp$ c}
    });
(*MatrixCm//MatrixForm
MatrixCc//MatrixForm*)
(*Calcul de l'inverse des tenseurs*)

TenseurSm = 1/(3km) TenseurJ +1/(2 $\mp$ m) TenseurK;
TenseurSc = 1/(3kc) TenseurJ +1/(2 $\mp$ c) TenseurK;
Print["Tenseurs de souplesse Sm et Sc"];
TenseurSm//MatrixForm
TenseurSc//MatrixForm

(*MatrixSm=Inverse[MatrixCm];
MatrixSc=Inverse[MatrixCc];
MatrixSm//MatrixForm
MatrixSc//MatrixForm*)

TenseurCmax= 3 Max[km, kc] TenseurJ + 2 Max[ $\mp$ m,  $\mp$ c] TenseurK;
TenseurCmin=3 Min[km, kc] TenseurJ + 2 Min[ $\mp$ m,  $\mp$ c] TenseurK;
TenseurSmax= 1/(3 Max[km, kc]) TenseurJ + 1/(2 Max[ $\mp$ m,  $\mp$ c])
TenseurK;
TenseurSmin= 1/(3 Min[km, kc]) TenseurJ + 1/(2 Min[ $\mp$ m,  $\mp$ c])
TenseurK;
Print["Tenseurs de rigidité et de souplesses des matériaux le
plus rigide et le plus souple Cmax ET Cmin"]
TenseurCmax//MatrixForm
TenseurCmin//MatrixForm
TenseurSmax//MatrixForm
TenseurSmin//MatrixForm
(*Entrée du tenseur de concentration d'Eshelby pour inclusion
ellipsoïdale de révolution*)

CoefG = r/(r^2-1)^(3/2) (r (r^2-1)^(1/2)- ArcCosh[r])
TenseurEsh=Table[0, {i, 1, 3}, {j, 1, 3}, {k, 1, 3}, {l, 1,
3}];

```

---

```

TenseurEsh[[1, 1, 1, 1]]=1/(2(1-vm))*(1 - 2vm +(3r^2-1)/(r^2-1)-(1 - 2vm +(3r^2)/(r^2-1))*CoefG);
TenseurEsh[[2, 2, 2, 2]]=(3/(8(1-vm)))(r^2/(r^2-1))+1/(4(1-vm))(1 - 2vm - 9/(4(r^2-1))) CoefG;
TenseurEsh[[3, 3, 3, 3]] = TenseurEsh[[2, 2, 2, 2]];
TenseurEsh[[2, 2, 3, 3]] = 1/(4(1-vm))(r^2/(2(r^2-1)) -(1 - 2vm + 3/(4(r^2-1))) CoefG);
TenseurEsh[[3, 3, 2, 2]]= TenseurEsh[[2, 2, 3, 3]];
TenseurEsh[[2, 2, 1, 1]] = -(1/(2(1-vm)))(r^2/(r^2-1))+1/(4(1-vm))((3r^2)/(r^2-1)-(1 - 2vm )) CoefG;
TenseurEsh[[3, 3, 1, 1]]=TenseurEsh[[2, 2, 1, 1]];
TenseurEsh[[1, 1, 2, 2]] = -(1/(2(1-vm)))(1 - 2vm +1/(r^2-1))+1/(2(1-vm))(1 - 2vm +3/(r^2-1)) CoefG;
TenseurEsh[[1, 1, 3, 3]]=TenseurEsh[[1, 1, 2, 2]];
TenseurEsh[[2, 3, 2, 3]] = (1/(4(1-vm)))(r^2/(2(r^2-1))+(1 - 2vm -3/(4(r^2-1))) CoefG);
TenseurEsh[[3, 2, 3, 2]]=TenseurEsh[[2, 3, 2, 3]];
TenseurEsh[[1, 2, 1, 2]]=(1/(4(1-vm)))(1 - 2vm - (r^2+1)/(r^2-1)-1/2 (1 - 2vm -(3(r^2+1))/(r^2-1)) CoefG);
TenseurEsh[[1, 3, 1, 3]]=TenseurEsh[[3, 2, 3, 2]];
(*Symétrie mineure*)
TenseurEsh[[3, 2, 2, 3]]= TenseurEsh[[2, 3, 2, 3]];
TenseurEsh[[2, 3, 3, 2]]= TenseurEsh[[2, 3, 2, 3]];
TenseurEsh[[3, 2, 3, 2]]= TenseurEsh[[2, 3, 2, 3]];

TenseurEsh[[2, 1, 1, 2]]=TenseurEsh[[1, 2, 1, 2]];
TenseurEsh[[1, 2, 2, 1]]=TenseurEsh[[1, 2, 1, 2]];
TenseurEsh[[2, 1, 2, 1]]=TenseurEsh[[1, 2, 1, 2]];

TenseurEsh[[3, 1, 1, 3]]=TenseurEsh[[1, 3, 1, 3]];
TenseurEsh[[1, 3, 3, 1]]=TenseurEsh[[1, 3, 1, 3]];
TenseurEsh[[3, 1, 3, 1]]=TenseurEsh[[1, 3, 1, 3]];

Print[" Tenseur de concentration d'Eshelby"];
TenseurEsh//MatrixForm
TenseurP =TensorContract[TensorProduct[TenseurEsh,
TenseurSmax], {{3,5},{4,6}} ];

Print[" Tenseur de polarisation de Hill pour borne max"];
TenseurP//MatrixForm

(*Détermination de la décomposition du Tenseur P*)
VecteurE3={1,0,0};

```

---

```

TenseurEL=TensorProduct[VecteurE3,VecteurE3,VecteurE3,VecteurE
3];
MatrixiT=IdentityMatrix[3]-TensorProduct[VecteurE3,VecteurE3];
TenseurJT=1/2 TensorProduct[MatrixiT, MatrixiT];
TenseurIT=Table[0, {i,1,3}, {j, 1,3},{k, 1,3},{l, 1,3}];
TenseurIT[[3,3,3,3]]=1;
TenseurIT[[2,2,2,2]]=1;
TenseurIT[[3,2,3,2]]=1/2;
TenseurIT[[3,2,2,3]]=TenseurIT[[3,2,3,2]];
TenseurIT[[2,3,3,2]]=TenseurIT[[3,2,3,2]];
TenseurIT[[2,3,2,3]]=TenseurIT[[3,2,3,2]];
TenseurKE=1/6 TensorProduct[(2
TensorProduct[VecteurE3,VecteurE3]-MatrixiT), (2
TensorProduct[VecteurE3,VecteurE3]-MatrixiT)];
TenseurF= Sqrt[2]/2 TensorProduct[MatrixiT, VecteurE3,
VecteurE3];
TenseurKT= TenseurIT - TenseurJT;
TenseurKL =TenseurK-TenseurKT-TenseurKE;
TenseurFT=TensorTranspose[TenseurF, {3,4,1,2}];

Print["Affichage des tenseurs orthogonaux de décomposition de
P"];
(*TenseurEL//MatrixForm
MatrixiT//MatrixForm
TenseurJT//MatrixForm
TenseurIT//MatrixForm
TenseurKE//MatrixForm
TenseurKL//MatrixForm
TenseurKT//MatrixForm
TenseurF//MatrixForm
TenseurFT//MatrixForm*)
coef $\rightarrow$ =TensorContract[TensorProduct[TenseurEL,TenseurP],{{1,7},
{3,5},{4,6},{2,8}}];
coef $\Uparrow$ =TensorContract[TensorProduct[TenseurJT,TenseurP],{{1,7},
{3,5},{4,6},{2,8}}];
coef $\bullet$ =TensorContract[TensorProduct[TenseurFT,TenseurP],{{1,7},{
3,5},{4,6},{2,8}}];
coef $\bullet$ p=TensorContract[TensorProduct[TenseurF,TenseurP],{{1,7},{
3,5},{4,6},{2,8}}];
coefO=(1/2)
TensorContract[TensorProduct[TenseurKT,TenseurP],{{1,7},{3,5},
{4,6},{2,8}}];

```

---

```

coefOp=(1/2)
TensorContract[TensorProduct[TenseurKL,TenseurP],{{1,7},{3,5},
{4,6},{2,8}}];
coef→c=coef↕/(coef→ coef↕-coef.^2);
coef↕c=coef→/(coef→ coef↕-coef.^2);
coef.c=- coef./(coef→ coef↕-coef.^2);
coef.pc=- coef./(coef→ coef↕-coef.^2);
coefOc=1/coefO;
coefOpc=1/coefOp;

Print["Affichage du tenseur P de Hill et de son inverse après
reconstitution"]
TenseurP = coef→ TenseurEL + coef↕ TenseurJT + coef.c TenseurF
+ coef.p TenseurFT + coefO TenseurKT + coefOp TenseurKL;
TenseurPinv = coef→c TenseurEL + coef↕c TenseurJT + coef.c
TenseurF + coef.pc TenseurFT + coefOc TenseurKT + coefOpc
TenseurKL;
TenseurP//MatrixForm
TenseurPinv//MatrixForm

(*Calcul du tenseur d'influence de Hill*)
Print["Affichage du Tenseur CmaxStar"]
TenseurCmaxStar=TenseurPinv-TenseurCmax;
TenseurCmaxStar//MatrixForm

Print["Les sommes du tenseur de Hill avec chacun des tenseurs
Cm et Cc "]
TenseurCmaxStarCm=TenseurCmaxStar+TenseurCm;
TenseurCmaxStarCc=TenseurCmaxStar+TenseurCc;
TenseurCmaxStarCm//MatrixForm;
TenseurCmaxStarCc//MatrixForm;

Print["Affichage du tenseur (TenseurCmaxStar + Cc) et de son
inverse "]
coef→3=TensorContract[TensorProduct[TenseurEL,TenseurCmaxStarC
c],{{1,7},{3,5},{4,6},{2,8}}];
coef↕3=TensorContract[TensorProduct[TenseurJT,TenseurCmaxStarC
c],{{1,7},{3,5},{4,6},{2,8}}];

```



---

```

coef•3=TensorContract[TensorProduct[TenseurFT,TenseurCmaxStarCc
],{{1,7},{3,5},{4,6},{2,8}}];
coef•p3=TensorContract[TensorProduct[TenseurF,TenseurCmaxStarCc
],{{1,7},{3,5},{4,6},{2,8}}];
coefO3=1/2
TensorContract[TensorProduct[TenseurKT,TenseurCmaxStarCc],{{1,
7},{3,5},{4,6},{2,8}}];
coefOp3=1/2
TensorContract[TensorProduct[TenseurKL,TenseurCmaxStarCc],{{1,
7},{3,5},{4,6},{2,8}}];
coef↦c3=coef↕3/(coef↦3 coef↕3-coef•3^2);
coef↕c3=coef↦3/(coef↦3 coef↕3-coef•3^2);
coef•c3=- coef•3/(coef↦3 coef↕3-coef•3^2);
coef•pc3=- coef•3/(coef↦3 coef↕3-coef•3^2);
coefOc3=1/coefO3;
coefOpc3=1/coefOp3;
TenseurCmaxStarCc = coef↦3 TenseurEL + coef↕3 TenseurJT +
coef•3 TenseurF + coef•p3 TenseurFT + coefO3 TenseurKT +
coefOp3 TenseurKL;
TenseurCmaxStarCcinv = coef↦c3 TenseurEL + coef↕c3 TenseurJT +
coef•c3 TenseurF + coef•pc3 TenseurFT + coefOc3 TenseurKT +
coefOpc3 TenseurKL;

TenseurCmaxStarCc//MatrixForm;
TenseurCmaxStarCcinv//MatrixForm;

Print["Affichage du tenseur (TenseurCmaxStar + Cm) et de son
inverse "]
coef↦4=TensorContract[TensorProduct[TenseurEL,TenseurCmaxStarC
m],{{1,7},{3,5},{4,6},{2,8}}];
coef↕4=TensorContract[TensorProduct[TenseurJT,TenseurCmaxStarC
m],{{1,7},{3,5},{4,6},{2,8}}];
coef•4=TensorContract[TensorProduct[TenseurFT,TenseurCmaxStarCm
],{{1,7},{3,5},{4,6},{2,8}}];

```

---

```

coef•p4=TensorContract[TensorProduct[TenseurF,TenseurCmaxStarCm],{{1,7},{3,5},{4,6},{2,8}}];
coefO4=1/2
TensorContract[TensorProduct[TenseurKT,TenseurCmaxStarCm],{{1,7},{3,5},{4,6},{2,8}}];
coefOp4=1/2
TensorContract[TensorProduct[TenseurKL,TenseurCmaxStarCm],{{1,7},{3,5},{4,6},{2,8}}];
coef↦c4=coef↕4/(coef↦4 coef↕4-coef•4^2);
coef↕c4=coef↦4/(coef↦4 coef↕4-coef•4^2);
coef•c4=- coef•4/(coef↦4 coef↕4-coef•4^2);
coef•pc4=- coef•4/(coef↦4 coef↕4-coef•4^2);
coefOc4=1/coefO4;
coefOpc4=1/coefOp4;
TenseurCmaxStarCm = coef↦4 TenseurEL + coef↕4 TenseurJT +
coef•4 TenseurF + coef•p4 TenseurFT + coefO4 TenseurKT +
coefOp4 TenseurKL;
TenseurCmaxStarCminv = coef↦c4 TenseurEL + coef↕c4 TenseurJT +
coef•c4 TenseurF + coef•pc4 TenseurFT + coefOc4 TenseurKT +
coefOpc4 TenseurKL;

TenseurCmaxStarCm//MatrixForm;
TenseurCmaxStarCminv//MatrixForm;

Print["Affichage des TenseurAAA=Tenseur [Vm(Cmax*+Cm)^-1+Vc(Cmax*+Cc)^-1] et de son inverse"]
TenseurAAA=(1-f)*TenseurCmaxStarCminv+f*TenseurCmaxStarCcinv;

coef↦6=TensorContract[TensorProduct[TenseurEL,TenseurAAA],{{1,7},{3,5},{4,6},{2,8}}];
coef↕6=TensorContract[TensorProduct[TenseurJT,TenseurAAA],{{1,7},{3,5},{4,6},{2,8}}];
coef•6=TensorContract[TensorProduct[TenseurFT,TenseurAAA],{{1,7},{3,5},{4,6},{2,8}}];

```

---

```

coef.p6=TensorContract[TensorProduct[TenseurF,TenseurAAA],{{1,7},
,{3,5},{4,6},{2,8}}];
coefO6=1/2
TensorContract[TensorProduct[TenseurKT,TenseurAAA],{{1,7},{3,5},
,{4,6},{2,8}}];
coefOp6=1/2
TensorContract[TensorProduct[TenseurKL,TenseurAAA],{{1,7},{3,5},
,{4,6},{2,8}}];
coef→c6=coef↕6/(coef→6 coef↕6-coef.6^2);
coef↕c6=coef→6/(coef→6 coef↕6-coef.6^2);
coef.c6=- coef.6/(coef→6 coef↕6-coef.6^2);
coef.pc6=- coef.6/(coef→6 coef↕6-coef.6^2);
coefOc6=1/coefO6;
coefOpc6=1/coefOp6;
TenseurAAA = coef→6 TenseurEL + coef↕6 TenseurJT + coef.6
TenseurF + coef.p6 TenseurFT + coefO6 TenseurKT + coefOp6
TenseurKL;
TenseurAAAinv= coef→c6 TenseurEL + coef↕c6 TenseurJT + coef.c6
TenseurF + coef.pc6 TenseurFT + coefOc6 TenseurKT + coefOpc6
TenseurKL;
TenseurAAA//MatrixForm;
TenseurAAAinv//MatrixForm;
Print["Borne inférieure de Hashin-Strikman unidirectionnelle"]

TenseurHashinInf=TensorContract[TensorProduct[((1-
f)TensorContract[TensorProduct[TenseurCm,TenseurCmaxStarCminv]
,{{3,5},{4,6}}]+ f
TensorContract[TensorProduct[TenseurCc,TenseurCmaxStarCcinv],{
{3,5},{4,6}}]),TenseurAAAinv],{{3,5},{4,6}}];
TenseurHashinInf//MatrixForm

Print["Tenseur d'orientation a2 et détermination de a4"]
a2={{1/3,0,0},{0,1/3,0},{0,0,1/3}};
Id={{1,0,0},{0,1,0},{0,0,1}};
a4=Table[(-
1/35)*(Id[[i,j]]*Id[[k,1]]+Id[[i,k]]*Id[[j,1]]+Id[[i,1]]*Id[[j
,k]])+(1/7)*(a2[[i,j]]*Id[[k,1]]+a2[[i,k]]*Id[[j,1]]+a2[[i,1]]

```

---

```

*Id[[j,k]]+a2[[k,1]]*Id[[i,j]]+a2[[j,1]]*Id[[i,k]]+a2[[j,k]]*I
d[[i,1]]),{i, 1,3},{j,1,3},{k,1,3},{1,1,3}];
a4=TensorProduct[a2, a2];
a2//MatrixForm
a4//MatrixForm

Print["Calcul des constantes B de la borne inférieure"]

Hsi=TenseurHashinInf;
B1i=Hsi[[1, 1, 1, 1]]+Hsi[[2, 2, 2, 2]]-2*Hsi[[1, 1, 2, 2]]-
4*Hsi[[1, 2, 1, 2]];
B2i=Hsi[[1, 1, 2, 2]]-Hsi[[2, 2, 3, 3]];
B3i=Hsi[[1, 2, 1, 2]]+0.5*(Hsi[[2, 2, 3, 3]]-Hsi[[2, 2, 2,
2]]);
B4i=Hsi[[2, 2, 3, 3]];
B5i=1/2*(Hsi[[2, 2, 2, 2]]-Hsi[[2, 2, 3, 3]])

Print["Tenseur de rigidité effective du composite : borne
inférieure"]
Ti=Table[B1i*a4[[i, j, k,
l]]+B2i*(a2[[i,j]]*Id[[k,1]]+a2[[k,1]]*Id[[i,j]])+B3i*(a2[[i,k]
]*Id[[j,1]]+a2[[i,1]]*Id[[j,k]]+a2[[j,1]]*Id[[i,k]]+a2[[j,k]]*
Id[[i,1]])+B4i*Id[[i,j]]*Id[[k,1]]+B5i*(Id[[i,k]]*Id[[j,1]]+Id
[[i,1]]*Id[[j,k]]),{i,1,3},{j,1,3},{k,1,3},{1,1,3}];
Ti//MatrixForm

Print["Les constantes de LAME lambda et mu sont données par :
"]
Lbdi=Ti[[1, 1, 2, 2]]
Mui=Ti[[1, 2, 1, 2]]
Print["Les caracteristiques mecaniques : E et upsilon sont :
"]
Myi=Mui*(3*Lbdi+2*Mui)/(Lbdi+Mui)

pi=((1/2) Lbdi)/(Lbdi+Mui)

```

### **Mori-Tanaka's model of estimation**

---

```

f=0.80
Em=2.518;
Ec=73.08;
vm=0.413;
vc=0.172;
r=3.018;

(*Valeur des coefficients km kc ̄m et ̄c *)

```

---

```

km=Em/(3(1-2vm));
¶m=Em/(2(1+vm));
kc=Ec/(3(1-2vc));
¶c=Ec/(2(1+vc));

ℓm=(Em vm)/((1+vm) (1-2vm));
ℓc=(Ec vc)/((1+vc) (1-2vc));

TenseurI=Table[1/2 (KroneckerDelta[i, k]
KroneckerDelta[j,l]+KroneckerDelta[i,l] KroneckerDelta[j,k]),
{i, 1,3},{j, 1,3},{k, 1,3},{l, 1,3}];
TenseurJ=1/3 TensorProduct[IdentityMatrix[3],
IdentityMatrix[3]];
TenseurK= TenseurI - TenseurJ;
TenseurCm= 3km TenseurJ + 2¶m TenseurK;
TenseurCc= 3kc TenseurJ + 2¶c TenseurK;

TenseurI//MatrixForm;
TenseurJ//MatrixForm;
TenseurK//MatrixForm;
Print["Tenseurs Cm et Cc"]
TenseurCm//MatrixForm
TenseurCc//MatrixForm
(*MatrixCm = ({
{ℓm+2¶m, ℓm, ℓm, 0, 0, 0},
{ℓm, ℓm+2¶m, ℓm, 0, 0, 0},
{ℓm, ℓm, ℓm+2¶m, 0, 0, 0},
{0, 0, 0, ¶m, 0, 0},
{0, 0, 0, 0, ¶m, 0},
{0, 0, 0, 0, 0, ¶m}
});
MatrixCc = ({
{ℓc+2¶c, ℓc, ℓc, 0, 0, 0},
{ℓc, ℓc+2¶c, ℓc, 0, 0, 0},
{ℓc, ℓc, ℓc+2¶c, 0, 0, 0},
{0, 0, 0, ¶c, 0, 0},
{0, 0, 0, 0, ¶c, 0},
{0, 0, 0, 0, 0, ¶c}

```

```

});
MatrixCm//MatrixForm
MatrixCc//MatrixForm*)
(*Calcul de l'inverse des tenseurs*)

TenseurSm = 1/(3km) TenseurJ +1/(2 $\nu$ m) TenseurK;
TenseurSc = 1/(3kc) TenseurJ +1/(2 $\nu$ c) TenseurK;
Print["Tenseurs de souplesse Sm et Sc"];
TenseurSm//MatrixForm
TenseurSc//MatrixForm

(*MatrixSm=Inverse[MatrixCm];
MatrixSc=Inverse[MatrixCc];
MatrixSm//MatrixForm
MatrixSc//MatrixForm*)

TenseurCmax= 3 Max[km, kc] TenseurJ + 2 Max[ $\nu$ m,  $\nu$ c] TenseurK;
TenseurCmin=3 Min[km, kc] TenseurJ + 2 Min[ $\nu$ m,  $\nu$ c] TenseurK;
TenseurSmax= 1/(3 Max[km, kc]) TenseurJ + 1/(2 Max[ $\nu$ m,  $\nu$ c])
TenseurK;
TenseurSmin= 1/(3 Min[km, kc]) TenseurJ + 1/(2 Min[ $\nu$ m,  $\nu$ c])
TenseurK;
Print["Tenseurs de rigidité et de souplesses des matériaux le
plus rigide et le plus souple Cmax ET Cmin"]
TenseurCmax//MatrixForm
TenseurCmin//MatrixForm
TenseurSmax//MatrixForm
TenseurSmin//MatrixForm
(*Entrée du tenseur de concentration d'Eshelby pour inclusion
ellipsoïdale de révolution*)

CoefG = r/(r^2-1)^(3/2) (r (r^2-1)^(1/2)- ArcCosh[r])
TenseurEsh=Table[0, {i, 1, 3}, {j, 1, 3}, {k, 1, 3}, {l, 1,
3}];
TenseurEsh[[1, 1, 1, 1]]=1/(2(1-vm))*(1 - 2vm +(3r^2-1)/(r^2-
1)-(1 - 2vm +(3r^2)/(r^2-1))*CoefG);
TenseurEsh[[2, 2, 2, 2]]=(3/(8(1-vm)))(r^2/(r^2-1))+1/(4(1-
vm)) (1 - 2vm - 9/(4(r^2-1))) CoefG;
TenseurEsh[[3, 3, 3, 3]] = TenseurEsh[[2, 2, 2, 2]];
TenseurEsh[[2, 2, 3, 3]] = 1/(4(1-vm)) (r^2/(2(r^2-1)) -(1 -
2vm + 3/(4(r^2-1))) CoefG);

```

---

```

TenseurEsh[[3, 3, 2, 2]]= TenseurEsh[[2, 2, 3, 3]];
TenseurEsh[[2, 2, 1, 1]]= -(1/(2(1-vm)))(r^2/(r^2-1))+1/(4(1-vm)) ((3r^2)/(r^2-1)-(1 - 2vm )) CoefG;
TenseurEsh[[3, 3, 1, 1]]=TenseurEsh[[2, 2, 1, 1]];
TenseurEsh[[1, 1, 2, 2]]=- (1/(2(1-vm)))(1 - 2vm +1/(r^2-1))+1/(2(1-vm)) (1 - 2vm +3/(r^2-1)) CoefG;
TenseurEsh[[1, 1, 3, 3]]=TenseurEsh[[1, 1, 2, 2]];
TenseurEsh[[2, 3, 2, 3]]= (1/(4(1-vm)))(r^2/(2(r^2-1)))+(1 - 2vm -3/(4(r^2-1))) CoefG);
TenseurEsh[[3, 2, 3, 2]]=TenseurEsh[[2, 3, 2, 3]];
TenseurEsh[[1, 2, 1, 2]]=(1/(4(1-vm)))(1 - 2vm - (r^2+1)/(r^2-1)-1/2 (1 - 2vm -(3(r^2+1))/(r^2-1)) CoefG);
TenseurEsh[[1, 3, 1, 3]]=TenseurEsh[[3, 2, 3, 2]];
(*Symétrie mineure*)
TenseurEsh[[3, 2, 2, 3]]= TenseurEsh[[2, 3, 2, 3]];
TenseurEsh[[2, 3, 3, 2]]= TenseurEsh[[2, 3, 2, 3]];
TenseurEsh[[3, 2, 3, 2]]= TenseurEsh[[2, 3, 2, 3]];

TenseurEsh[[2, 1, 1, 2]]=TenseurEsh[[1, 2, 1, 2]];
TenseurEsh[[1, 2, 2, 1]]=TenseurEsh[[1, 2, 1, 2]];
TenseurEsh[[2, 1, 2, 1]]=TenseurEsh[[1, 2, 1, 2]];

TenseurEsh[[3, 1, 1, 3]]=TenseurEsh[[1, 3, 1, 3]];
TenseurEsh[[1, 3, 3, 1]]=TenseurEsh[[1, 3, 1, 3]];
TenseurEsh[[3, 1, 3, 1]]=TenseurEsh[[1, 3, 1, 3]];

Print[" Tenseur de concentration d'Eshelby"];
TenseurEsh//MatrixForm
TenseurP =TensorContract[TensorProduct[TenseurEsh, TenseurSm],
{{3,5},{4,6}} ];

Print[" Tenseur de polarisation de Hill pour borne min"];
TenseurP//MatrixForm

(*Détermination du tenseur AEshelby*)
Print["Valeur de AEshelby est donnée par :"]
TenseurA1=TenseurI +
TensorContract[TensorProduct[TenseurP, (TenseurCc-TenseurCm)],
{{3,5},{4,6}}];
TenseurA1//MatrixForm
(*Détermination de la décomposition du Tenseur AEshelby*)
VecteurE3={1,0,0};
TenseurEL=TensorProduct[VecteurE3,VecteurE3,VecteurE3,VecteurE3];

```

---

```

MatrixiT=IdentityMatrix[3]-TensorProduct[VecteurE3,VecteurE3];
TenseurJT=1/2 TensorProduct[MatrixiT, MatrixiT];
TenseurIT=Table[0, {i,1,3}, {j, 1,3},{k, 1,3},{l, 1,3}];
TenseurIT[[3,3,3,3]]=1;
TenseurIT[[2,2,2,2]]=1;
TenseurIT[[3,2,3,2]]=1/2;
TenseurIT[[3,2,2,3]]=TenseurIT[[3,2,3,2]];
TenseurIT[[2,3,3,2]]=TenseurIT[[3,2,3,2]];
TenseurIT[[2,3,2,3]]=TenseurIT[[3,2,3,2]];
TenseurKE=1/6 TensorProduct[(2
TensorProduct[VecteurE3,VecteurE3]-MatrixiT), (2
TensorProduct[VecteurE3,VecteurE3]-MatrixiT)];
TenseurF= Sqrt[2]/2 TensorProduct[MatrixiT, VecteurE3,
VecteurE3];
TenseurKT= TenseurIT - TenseurJT;
TenseurKL =TenseurK-TenseurKT-TenseurKE;
TenseurFT=TensorTranspose[TenseurF, {3,4,1,2}];
Print["Affichage des tenseurs orthogonaux de décomposition de
A1"];
(*TenseurEL//MatrixForm
MatrixiT//MatrixForm
TenseurJT//MatrixForm
TenseurIT//MatrixForm
TenseurKE//MatrixForm
TenseurKL//MatrixForm
TenseurKT//MatrixForm
TenseurF//MatrixForm
TenseurFT//MatrixForm*)
coef↗=TensorContract[TensorProduct[TenseurEL,TenseurA1],{{1,7}
,{3,5},{4,6},{2,8}}];
coef↕=TensorContract[TensorProduct[TenseurJT,TenseurA1],{{1,7}
,{3,5},{4,6},{2,8}}];
coef•=TensorContract[TensorProduct[TenseurFT,TenseurA1],{{1,7},
{3,5},{4,6},{2,8}}];
coef•p=TensorContract[TensorProduct[TenseurF,TenseurA1],{{1,7},
{3,5},{4,6},{2,8}}];
coefO=1/2
TensorContract[TensorProduct[TenseurKT,TenseurA1],{{1,7},{3,5}
,{4,6},{2,8}}];

```



---

```

coefOp=1/2
TensorContract[TensorProduct[TenseurKL,TenseurA1],{{1,7},{3,5},
{4,6},{2,8}}];
coef→c=coef↕/(coef→ coef↕-coef.^2);
coef↕c=coef→/(coef→ coef↕-coef.^2);
coef.c=- coef./(coef→ coef↕-coef.^2);
coef.pc=- coef./(coef→ coef↕-coef.^2);
coefOc=1/coefO;
coefOpc=1/coefOp;

Print["Affichage du TenseurA1 et de AEshelby son inverse après
reconstitution"]
TenseurA1 = coef→ TenseurEL + coef↕ TenseurJT + coef.c TenseurF
+ coef.p TenseurFT + coefO TenseurKT + coefOp TenseurKL;
AEshelby = coef→c TenseurEL + coef↕c TenseurJT + coef.c
TenseurF + coef.pc TenseurFT + coefOc TenseurKT + coefOpc
TenseurKL;
TenseurA1//MatrixForm
AEshelby//MatrixForm

(*Tenseur Mori Tanaka*)
TenseurB1=((1-f) TenseurI + f AEshelby);
TenseurB1//MatrixForm

Print["Affichage du tenseur Mori Tanaka"]
coef→3=TensorContract[TensorProduct[TenseurEL,TenseurB1],{{1,7},
{3,5},{4,6},{2,8}}];
coef↕3=TensorContract[TensorProduct[TenseurJT,TenseurB1],{{1,7},
{3,5},{4,6},{2,8}}];
coef.c3=TensorContract[TensorProduct[TenseurFT,TenseurB1],{{1,7},
{3,5},{4,6},{2,8}}];
coef.p3=TensorContract[TensorProduct[TenseurF,TenseurB1],{{1,7},
{3,5},{4,6},{2,8}}];
coefO3=1/2
TensorContract[TensorProduct[TenseurKT,TenseurB1],{{1,7},{3,5},
{4,6},{2,8}}];

```

---

```

coefOp3=1/2
TensorContract[TensorProduct[TenseurKL,TenseurB1],{{1,7},{3,5},
{4,6},{2,8}}];
coef $\rightarrow$ c3=coef $\updownarrow$ 3/(coef $\rightarrow$ 3 coef $\updownarrow$ 3-coef. $3^2$ );
coef $\updownarrow$ c3=coef $\rightarrow$ 3/(coef $\rightarrow$ 3 coef $\updownarrow$ 3-coef. $3^2$ );
coef. $c_3$ =- coef. $3$ /(coef $\rightarrow$ 3 coef $\updownarrow$ 3-coef. $3^2$ );
coef. $p_3$ =- coef. $3$ /(coef $\rightarrow$ 3 coef $\updownarrow$ 3-coef. $3^2$ );
coefOc3=1/coefO3;
coefOpc3=1/coefOp3;
TenseurB1 = coef $\rightarrow$ 3 TenseurEL + coef $\updownarrow$ 3 TenseurJT + coef. $3$ 
TenseurF + coef. $p_3$  TenseurFT + coefO3 TenseurKT + coefOp3
TenseurKL;
TenseurB1Inv = coef $\rightarrow$ c3 TenseurEL + coef $\updownarrow$ c3 TenseurJT + coef. $c_3$ 
TenseurF + coef. $p_3$  TenseurFT + coefOc3 TenseurKT + coefOpc3
TenseurKL;

Print["Affichage du tenseur AMT"]
TenseurAMT=TensorContract[TensorProduct[AEShelby,
TenseurB1Inv], {{3,5},{4,6}} ];
TenseurB1//MatrixForm
TenseurAMT//MatrixForm

Print["Affichage du tenseur MT Unidirectionnel "]
TenseurCMTUD = TenseurCm + TensorContract[TensorProduct[f
(TenseurCc-TenseurCm), TenseurAMT], {{3,5},{4,6}} ];
TenseurCMTUD//MatrixForm

Print["Tenseur d'orientation a2 et détermination de a4"]
a2={{1/3,0,0},{0,1/3,0},{0,0,1/3}};
Id={{1,0,0},{0,1,0},{0,0,1}};
a4=Table[(-
1/35)*(Id[[i,j]]*Id[[k,l]]+Id[[i,k]]*Id[[j,l]]+Id[[i,l]]*Id[[j
,k]])+(1/7)*(a2[[i,j]]*Id[[k,l]]+a2[[i,k]]*Id[[j,l]]+a2[[i,l]]
*Id[[j,k]]+a2[[k,l]]*Id[[i,j]]+a2[[j,l]]*Id[[i,k]]+a2[[j,k]]*I
d[[i,l]]),{i, 1,3},{j,1,3},{k,1,3},{l,1,3}];
a4=TensorProduct[a2, a2];
a2//MatrixForm
a4//MatrixForm

```

---

```

Print["Calcul des constantes CM Homogénéisé de MT"]

Hsi=TenseurCMTUD;
B1i=Hsi[[1, 1, 1, 1]]+Hsi[[2, 2, 2, 2]]-2*Hsi[[1, 1, 2, 2]]-
4*Hsi[[1, 2, 1, 2]];
B2i=Hsi[[1, 1, 2, 2]]-Hsi[[2, 2, 3, 3]];
B3i=Hsi[[1, 2, 1, 2]]+0.5*(Hsi[[2, 2, 3, 3]]-Hsi[[2, 2, 2,
2]]);
B4i=Hsi[[2, 2, 3, 3]];
B5i=1/2*(Hsi[[2, 2, 2, 2]]-Hsi[[2, 2, 3, 3]]);

Print["Tenseur de rigidité effective du composite : borne
inférieure"]
Ti=Table[B1i*a4[[i, j, k,
l]]+B2i(a2[[i,j]]*Id[[k,l]]+a2[[k,l]]*Id[[i,j]])+B3i*(a2[[i,k]
]*Id[[j,l]]+a2[[i,l]]*Id[[j,k]]+a2[[j,l]]*Id[[i,k]]+a2[[j,k]]*
Id[[i,l]])+B4i*Id[[i,j]]*Id[[k,l]]+B5i*(Id[[i,k]]*Id[[j,l]]+Id
[[i,l]]*Id[[j,k]]),{i,1,3},{j,1,3},{k,1,3},{l,1,3}];
Ti//MatrixForm

Print["Les constantes de LAME lambda et mu sont données par :
"]
Lbdi=Ti[[1, 1, 2, 2]]
Mui=Ti[[1, 2, 1, 2]]
Print["Les caracteristiques mecaniques : E et upsilon sont :
"]
Myi=Mui*(3*Lbdi+2*Mui)/(Lbdi+Mui)
pi=((1/2)*Lbdi)/(Lbdi+Mui)

```
